# Supplementary material for: GATA6 defines endoderm fate by controlling chromatin accessibility during differentiation of human-induced pluripotent stem cells
Source: PubMed Central journal article supplement — Cell Rep. Author manuscript; Available in PMC 2021 Jun 14. (PMC8202205; doi:10.1016/j.celrep.2021.109145), 2021-05-18
Supplement: NIHMS1706275-supplement-1.pdf [file NIHMS1706275-supplement-1.pdf]

Cell Reports, Volume 35

**Supplemental information**

**GATA6 defines endoderm fate by controlling  
chromatin accessibility during differentiation  
of human-induced pluripotent stem cells**

**James A. Heslop, Behshad Pournasr, Jui-Tung Liu, and Stephen A. Duncan**

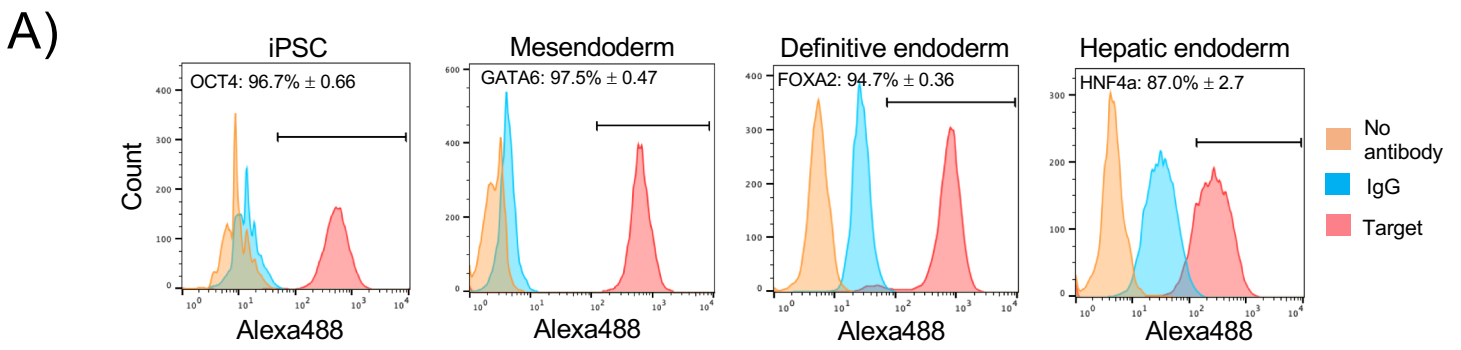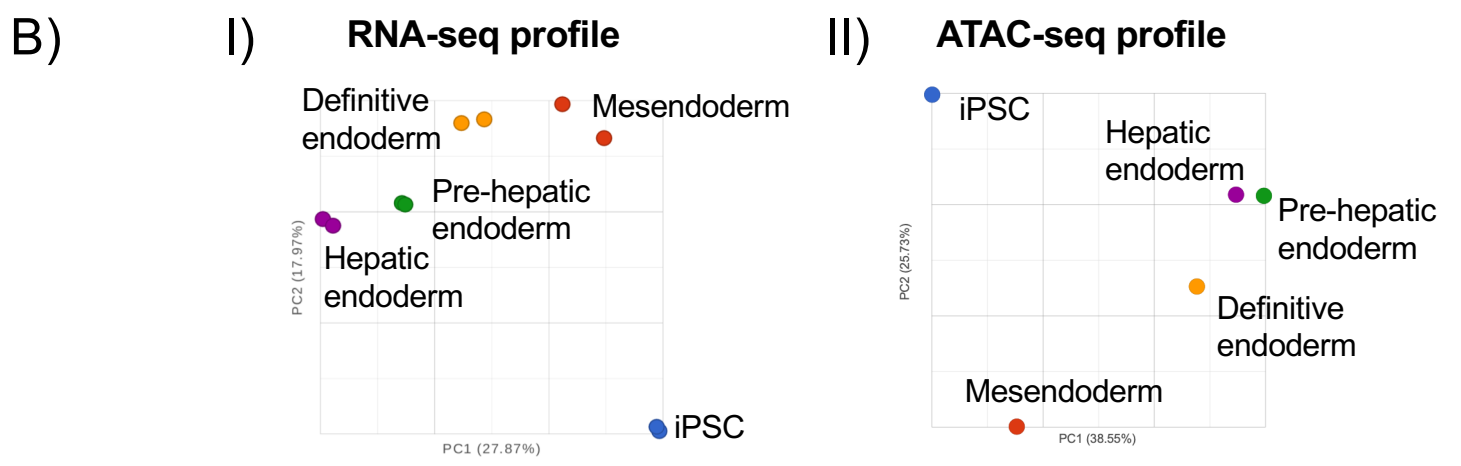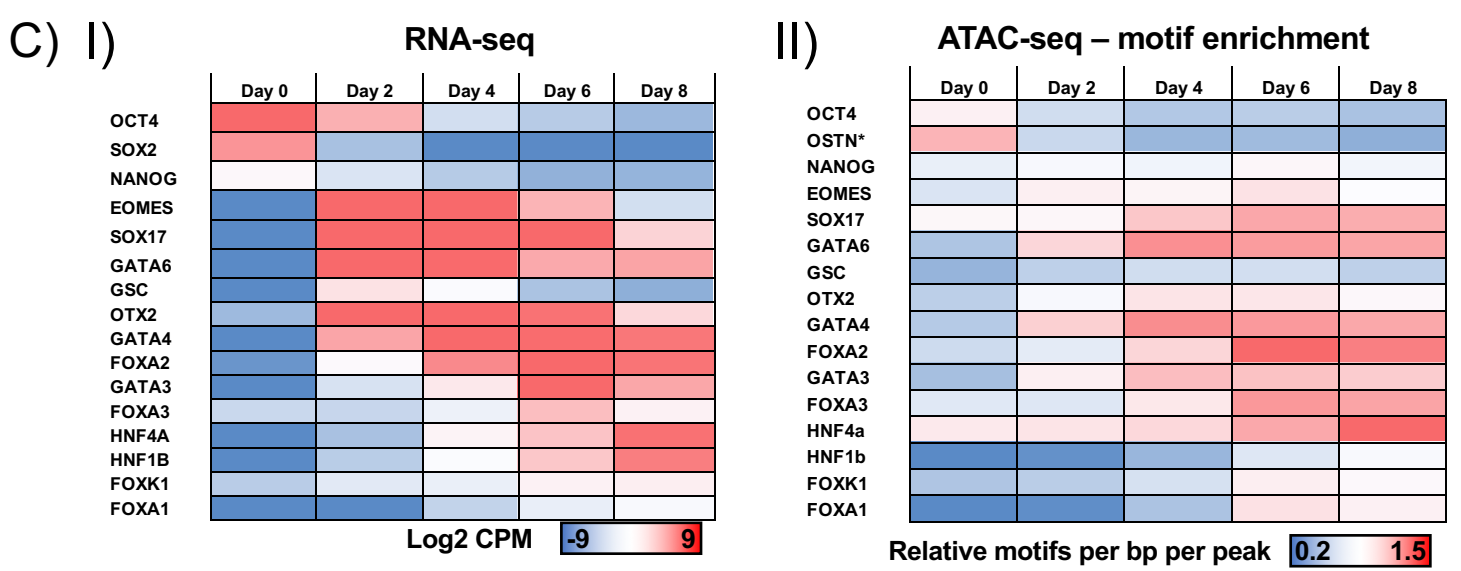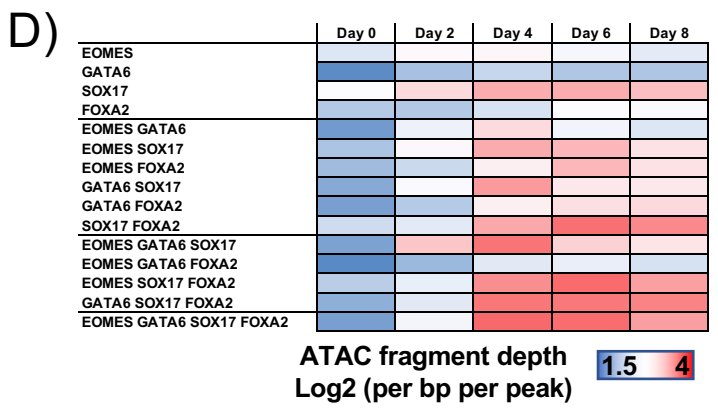

Day 0: Pluripotent      Day 6: Pre-hepatic endoderm  
 Day 2: Mesendoderm      Day 8: Hepatic endoderm  
 Day 4: Definitive endoderm

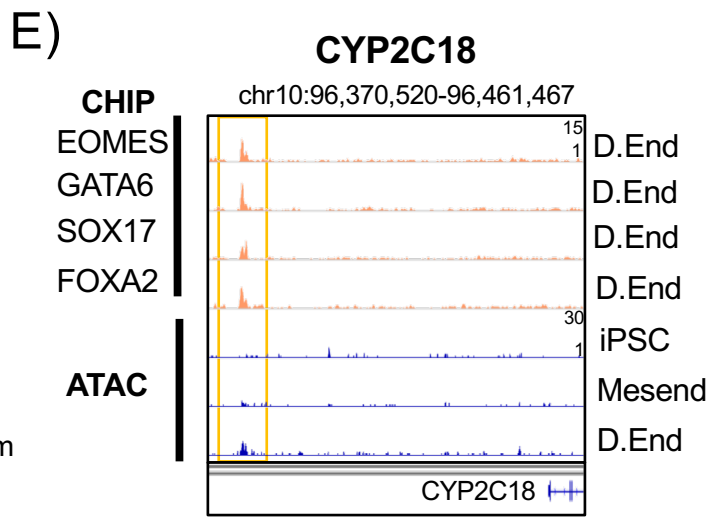

**Figure S1: Further analysis of chromatin accessibility during endoderm formation.**

Related to Figure 1. A) Flow cytometry analysis of stage-enriched markers during differentiation of pluripotent stem cells to hepatic endoderm, n=3 mean  $\pm$  SD; B) Principal Component Analysis (PCA) of I) RNA-seq and II) ATAC-seq samples in *GATA6*<sup>+/+</sup> cells transitioning from pluripotent cells to hepatic endoderm cell populations; C) Comparing RNA-seq and ATAC-seq datasets I) RNA-seq gene expression profile heatmap of transcriptional regulators at 48-hour intervals. Heatmap values normalized by counts per million (CPM; mean, n=2) and shown as log<sub>2</sub> values. Regulators listed in order of when peak gene expression is achieved; II) Motif enrichment heatmap of identified transcriptional regulators at ATAC peak center (within 200bp). Values shown relative to motif enrichment 2kb downstream from peak center. Regulators listed according to peak gene expression. \*OSTN: OCT4, SOX2, TCF4 and NANOG motif; D) ATAC-seq fragment depth during endoderm formation and hepatic specification at combinations of endoderm-enriched transcription factor co-binding (Figure 1C), displayed as log<sub>2</sub> values; E) Genome viewer representation of *CYP2C18* genomic loci using published CHIP-seq EOMES, GATA6, SOX17 and FOXA2 datasets (Tsankov et al., 2015) overlapped with ATAC-seq data during endoderm formation.

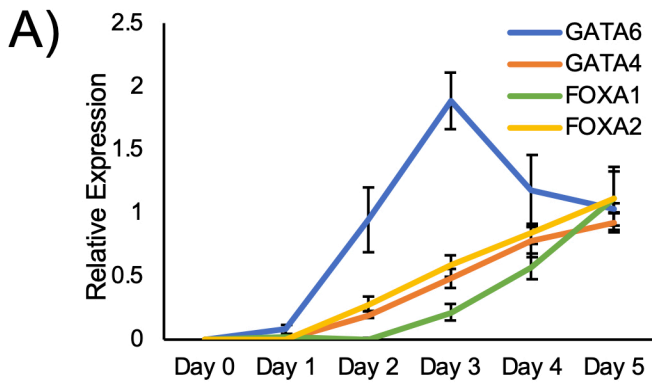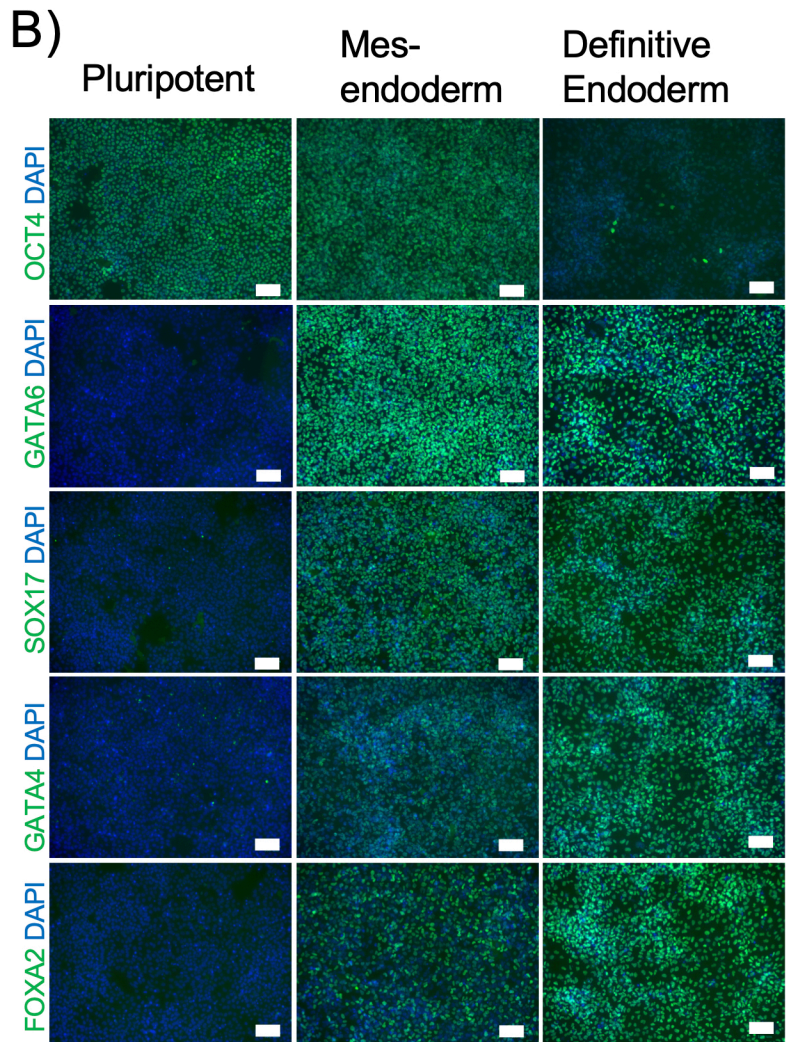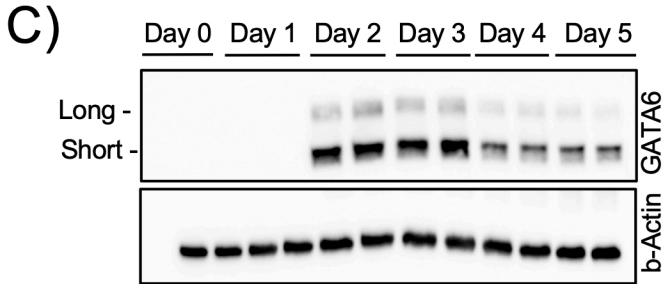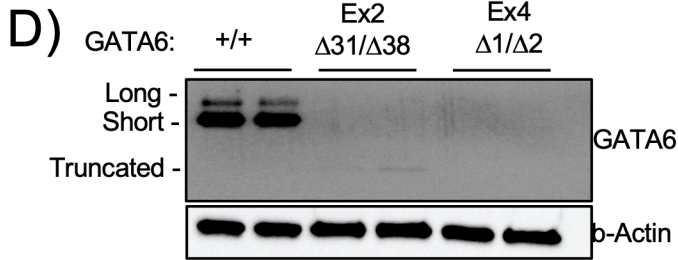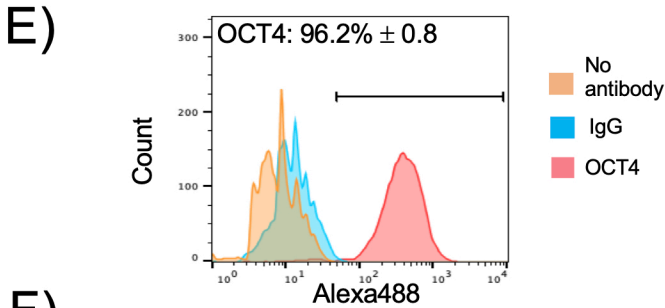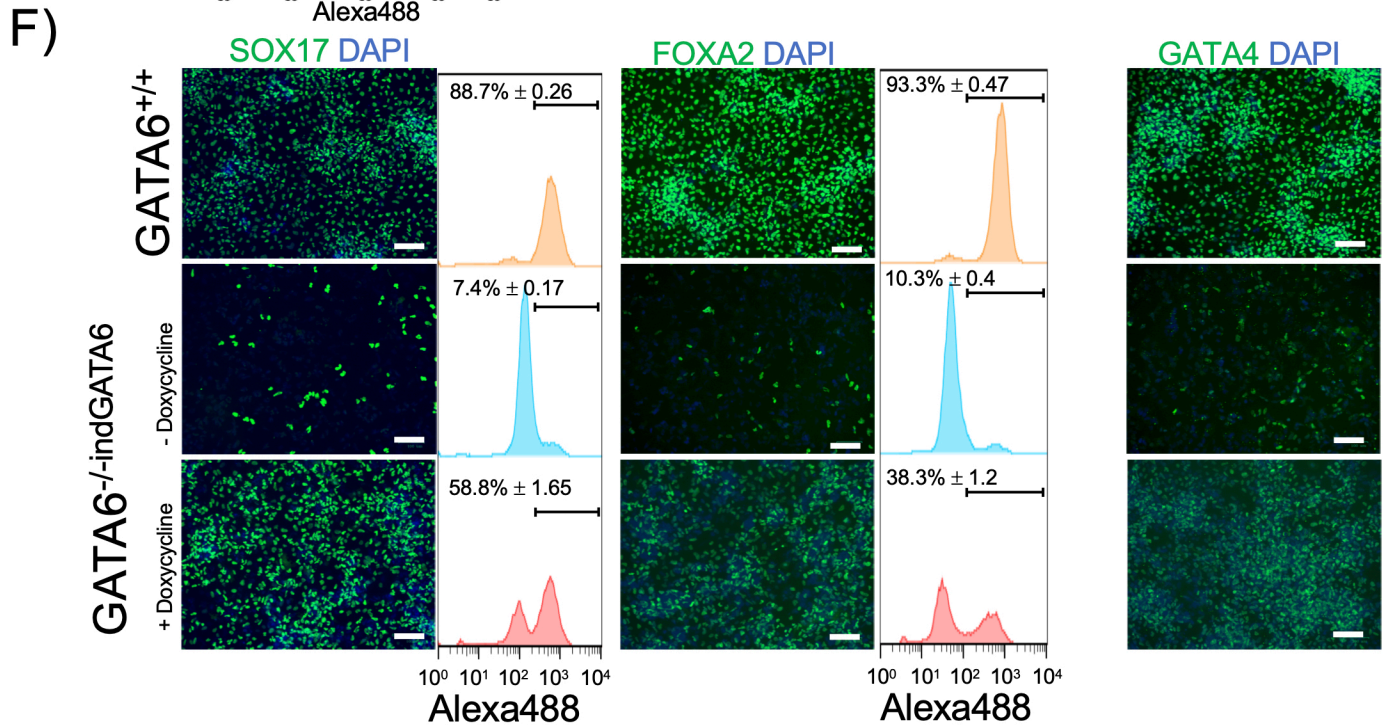

**Figure S2: Extended characterization of *GATA6*<sup>-/-</sup> cells during endoderm formation.**

Related to Figure 2. A) Graph showing RT-qPCR analysis of *GATA4*, *GATA6*, *FOXA1* and *FOXA2* mRNAs during endoderm formation. mRNA levels normalized to the housekeeping mRNA *RPL13a* (n=4 mean ± SD); B) Immunofluorescence analysis of OCT4, *GATA6*, *GATA4*, *SOX17* and *FOXA2* with DAPI nuclei staining in *GATA6*<sup>+/+</sup> cells during endoderm formation. Scale bar: 100μM; C) Western blot analysis of *GATA6* and β-actin protein expression during endoderm formation in *GATA6*<sup>+/+</sup> cells; D) Extended exposure western blot analysis of *GATA6* and β-actin in *GATA6*<sup>+/+</sup>, *GATA6*<sup>Ex2Δ31/Δ38</sup> and *GATA6*<sup>Ex4Δ1/Δ2</sup> cell lines at day 2 of differentiation showing truncated protein in *GATA6*<sup>Ex2Δ31/Δ38</sup> cells; E) Flow cytometry analysis for OCT4 positive cells within the *GATA6*<sup>Ex4Δ1/Δ2;ind *GATA6*</sup> pluripotent cell population, n=3 mean ± SD; F) Immunofluorescence analysis of *SOX17*, *FOXA2* and *GATA4* in *GATA6*<sup>+/+</sup> and *GATA6*<sup>Ex4Δ1/Δ2;ind *GATA6*</sup> cells with and without doxycycline at day 4 of differentiation. Scale bar: 100μM. *SOX17* and *FOXA2* positive cells within the population determined by flow cytometry, n=3 mean ± SD.

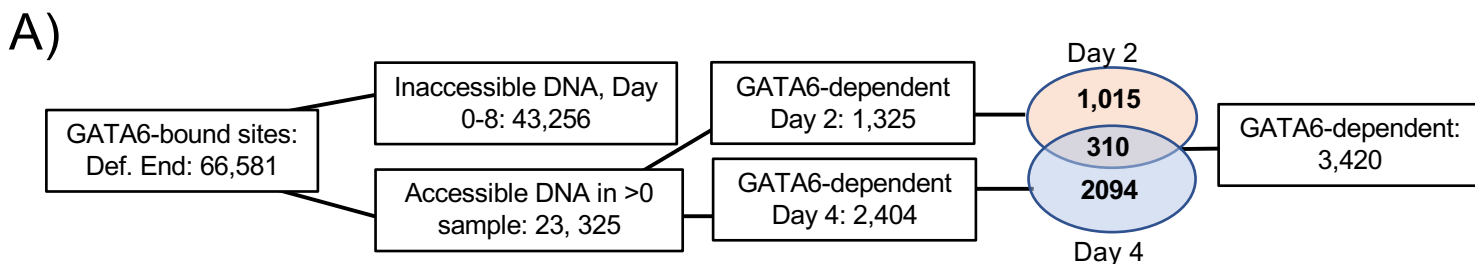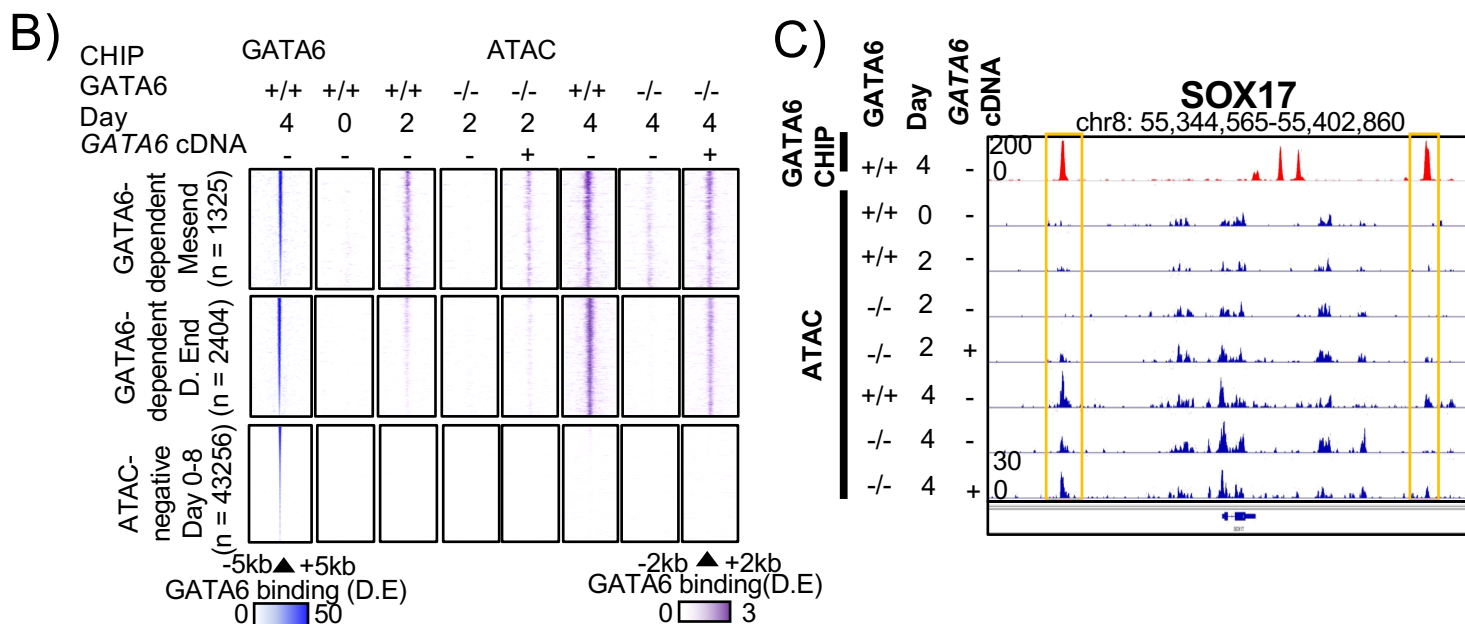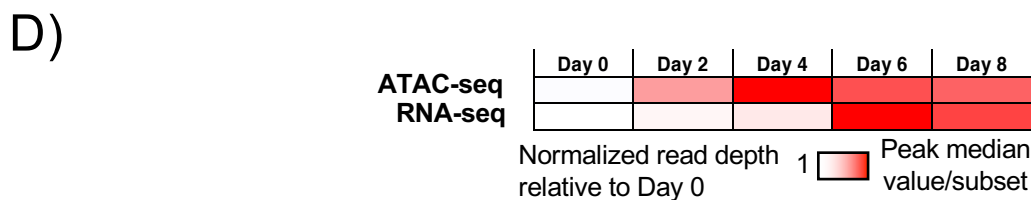

**E)** GATA6-bound regions that neighbor hepatic-endoderm induced genes (n=5,631)

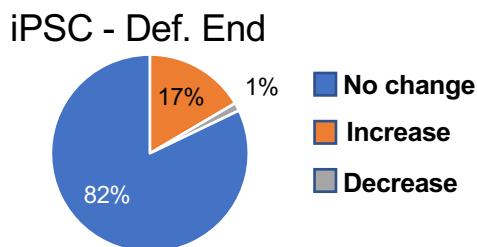

**F)** GATA6-bound regions that neighbor hepatic-endoderm induced genes

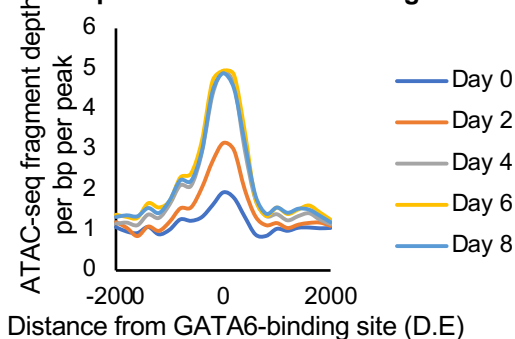

**G)**

| Mesendoderm            |          |                                                     |          |
|------------------------|----------|-----------------------------------------------------|----------|
| GATA6-dependent n=2206 |          | GATA6 <sup>Ex4:1/2</sup> ;ind GATA6 enriched n=1242 |          |
| GATA4                  | 1.00E-78 | EOMES                                               | 1.00E-52 |
| GATA6                  | 1.00E-77 | TBOX:SMAD                                           | 1.00E-18 |
| GATA3                  | 1.00E-77 | ZIC3                                                | 1.00E-14 |
| SOX17                  | 1.00E-75 | LHX1                                                | 1.00E-09 |
| EOMES                  | 1.00E-69 | TGIF1                                               | 1.00E-09 |
| ZIC3                   | 1.00E-12 | ISL1                                                | 1.00E-07 |
| GSC                    | 1.00E-06 | TGIF2                                               | 1.00E-07 |
| OTX2                   | 1.00E-05 | MEIS1                                               | 1.00E-05 |

| Definitive endoderm    |           |                                                    |          |
|------------------------|-----------|----------------------------------------------------|----------|
| GATA6-dependent n=3342 |           | GATA6 <sup>Ex4:1/2</sup> ;ind GATA6 enriched n=899 |          |
| GATA4                  | 1.00E-149 | OSTN*                                              | 1.00E-06 |
| GATA6                  | 1.00E-147 | OCT4                                               | 1.00E-05 |
| GATA3                  | 1.00E-134 | GATA6                                              | 1.00E-04 |
| GSC                    | 1.00E-28  | GATA4                                              | 1.00E-04 |
| OTX2                   | 1.00E-26  | KLF4                                               | 1.00E-04 |
| SOX17                  | 1.00E-23  | GATA3                                              | 1.00E-04 |
| FOXA1                  | 1.00E-20  | TCF3                                               | 1.00E-03 |
| EOMES                  | 1.00E-18  | SP5                                                | 1.00E-03 |

**Figure S3: GATA6-dependent changes in chromatin accessibility.** Related to Figure 3. A) The alignment of ATAC-seq datasets to GATA6-bound sites in definitive endoderm (Fisher et al., 2017); B) Heatmap representation of GATA6 (blue) and ATAC-seq (purple) at GATA6 binding sites during endoderm formation in *GATA6*<sup>+/+</sup> and *GATA6*<sup>Ex4Δ1/Δ2;ind GATA6</sup> pluripotent cells +/- doxycycline. Signal intensity represents read density. Heatmaps are split based on chromatin accessibility profile during endoderm formation determined in Figure S3A. *GATA6*<sup>-/-</sup> refers to *GATA6*<sup>Ex4Δ1/Δ2;ind GATA6</sup> cells; C) Genome viewer representation of ATAC-seq and GATA6-CHIP-seq datasets demonstrating GATA6-dependent chromatin remodeling at presumptive transcriptional enhancers of SOX17. *GATA6*<sup>-/-</sup> refers to *GATA6*<sup>Ex4Δ1/Δ2;ind GATA6</sup> cells; D) Heatmap representation of chromatin accessibility at GATA6-bound enhancers with GATA6-dependent accessibility and the mRNA expression of genes that neighbor the selected enhancers during the hepatic differentiation protocol. Selected sites have GATA6-dependent chromatin accessibility in definitive endoderm, and mRNA levels that are significantly induced post-definitive endoderm. Median values of the ATAC-seq and RNA-seq (ATAC seq: Tag density. RNA-seq: counts per million) datasets displayed relative to day 0 values, n=180 regions relating to Figure 3C; E) Pie chart depicting all GATA6-bound regions that neighbor genes that are significantly induced during hepatic specification. Regions with 2-fold change difference in ATAC-seq fragment between iPSC (Day 0) and definitive endoderm (Day 4) populations identified as regions that increased or decreased in accessibility; F) Graph showing ATAC-seq fragment depth at GATA6-bound regions that neighbor genes induced during hepatic specification between Day 0 (iPSCs) and Day 8 (hepatic endoderm). Graph centered on GATA6 binding sites in definitive endoderm, n=5,631 regions; G) Motifs enriched at all sites of GATA6-dependent chromatin accessibility and at sites that are increased in the absence of GATA6 in *GATA6*<sup>Ex4Δ1/Δ2;ind GATA6</sup> cells in mesendoderm and definitive endoderm. P values: hypergeometric enrichment test using HOMER motif analysis with default background. \*OSTN: OCT4, SOX2, TCF4, NANOG motif

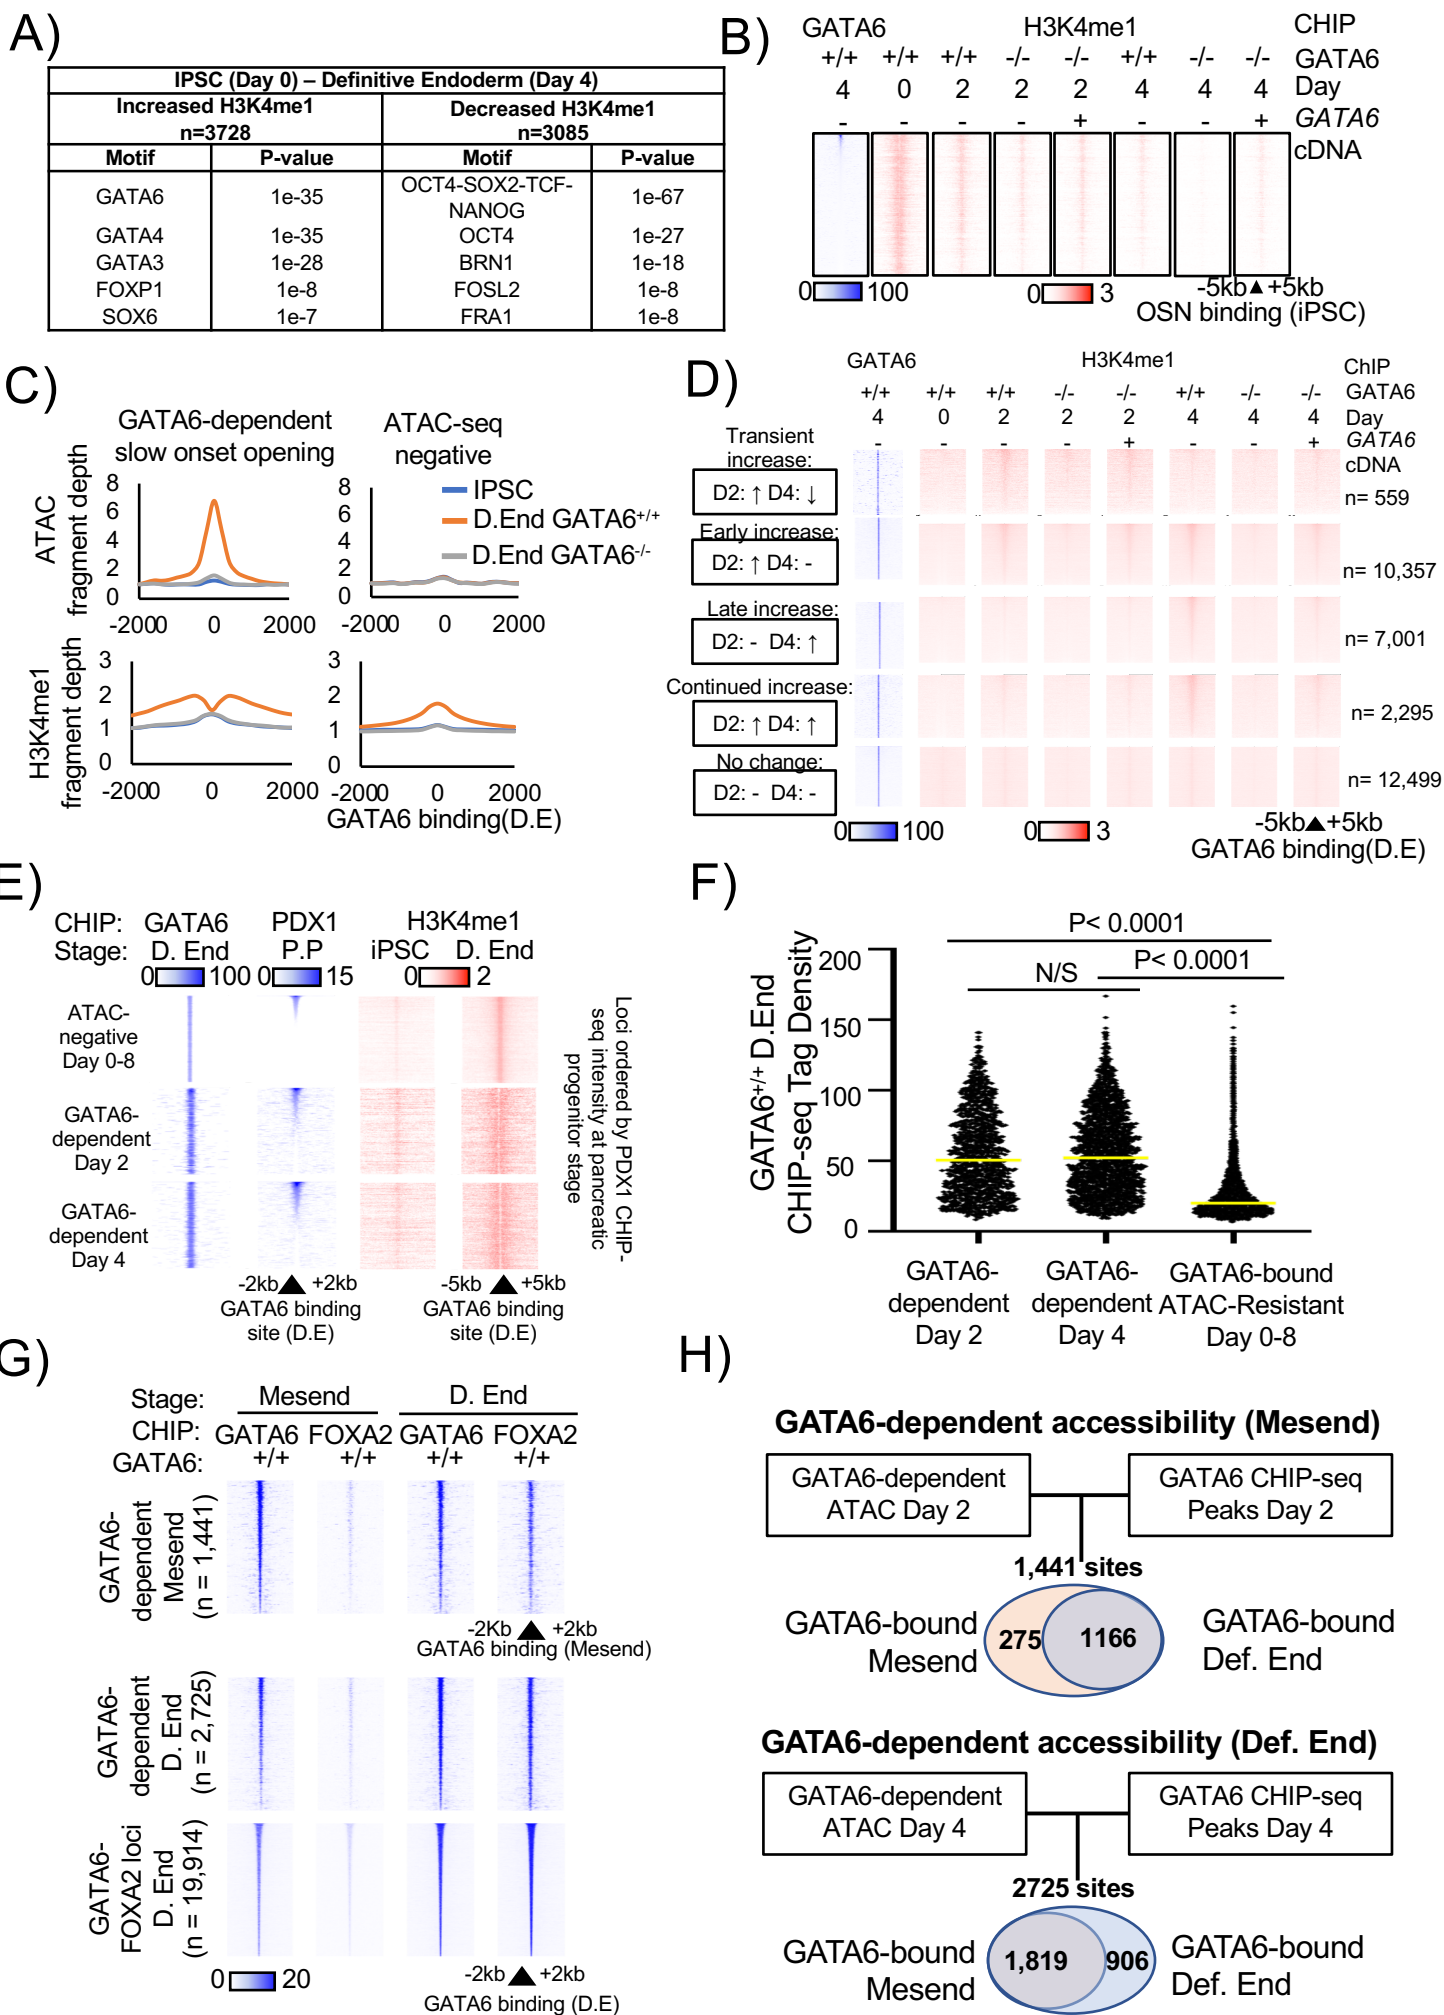



**Figure S4: GATA6 binding induces H3K4me1 accumulation and most commonly binds in mesendoderm at GATA6-dependent chromatin remodeled loci.** Related to Figures 3 and 4. A) Transcription factor binding motifs enriched at regions that increase or decrease in H3K4me1 accumulation during definitive endoderm formation. Differential H3K4me1 peaks determined as FDR<0.01 and fold change >2; P values: hypergeometric enrichment test using HOMER motif analysis with default background; B) Heatmap depicting GATA6-independent loss of H3K4me1 (red) at regions of OCT4-SOX2-NANOG binding during definitive endoderm formation. OCT4, SOX2 NANOG binding sites determined from previously published CHIP-seq datasets (Tsankov et al., 2015); C) Histogram depicting ATAC-seq and H3K4me1 fragment depths at GATA6 binding sites (definitive endoderm) with GATA6-dependent chromatin accessibility (n=2,404) or that remain ATAC-negative (n=43,256) in *GATA6*<sup>+/+</sup> and *GATA6*<sup>Ex4Δ1/Δ2;ind *GATA6*</sup> cells; D) Temporal profile of H3K4me1 (red) during definitive endoderm formation at GATA6 binding loci (blue) that remain ATAC-negative between day 0 and day 8 in *GATA6*<sup>+/+</sup> and *GATA6*<sup>Ex4Δ1/Δ2;ind *GATA6*</sup> cells +/- doxycycline. Differential H3K4me1 tag density at GATA6 bound loci determined as being >1.5 log2 fold change; E) Heatmap depicting published PDX1 CHIP-seq density at pancreatic progenitor (P.P) stage (Lee et al., 2019) aligned with GATA6-bound loci in definitive endoderm demonstrating PDX1 engagement at subsets of GATA6-dependent patterning during early pancreatic specification and that these regions increase in H3K4me1 deposition (red). See Figure S3A for no. of sites in each subset; F) GATA6-CHIP-seq tag density scatter graph at regions of GATA6-dependent chromatin remodeling and ATAC-negative sites. Mann-Whitney U Test, P-values displayed on graph, median value shown as yellow line. See Figure S3A for no. of sites in each subset; G) Heatmaps depicting GATA6 and FOXA2 CHIP-seq intensity at loci of GATA6-FOXA2 co-binding, and GATA6-dependent chromatin remodeling at day 2 (mesendoderm) and day 4 (definitive endoderm) in *GATA6*<sup>+/+</sup> definitive endoderm; H) Number of alignments between GATA6-dependently accessible chromatin loci in mesendoderm (upper panel) and definitive endoderm (lower panel) with the corresponding GATA6 CHIP-seq peaks from *GATA6*<sup>+/+</sup> mesendoderm and definitive endoderm cell populations. Venn diagram depicting the overlap of mesendoderm and definitive endoderm stage GATA6 CHIP-seq peaks with regions of rapid and slow onset GATA6-dependent chromatin remodeling.

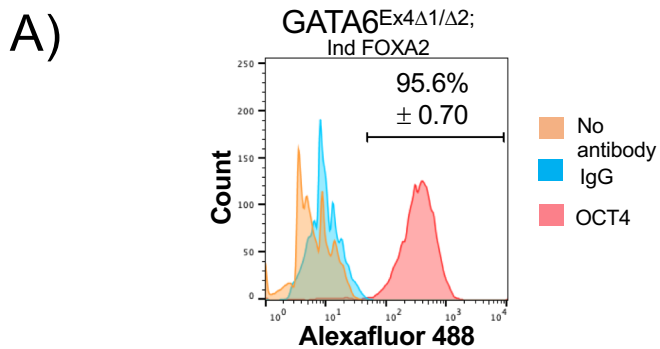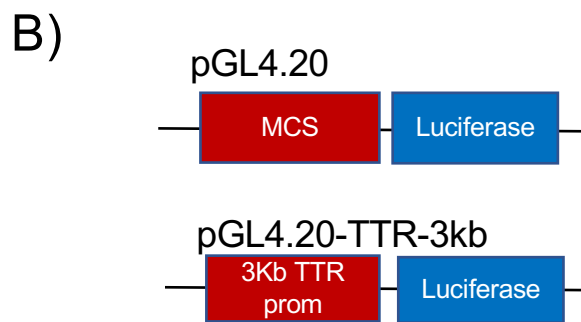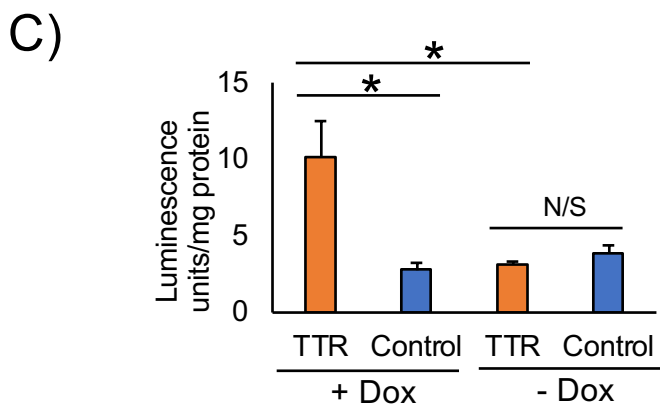

**D)**

| Motif Name   | P-value |
|--------------|---------|
| ZIC          | 1e-5    |
| NF1-halfsite | 1e-4    |
| MAFA         | 1e-4    |
| OCT4         | 1e-4    |
| GATA3        | 1e-4    |
| JUNB/AP1     | 1e-3    |

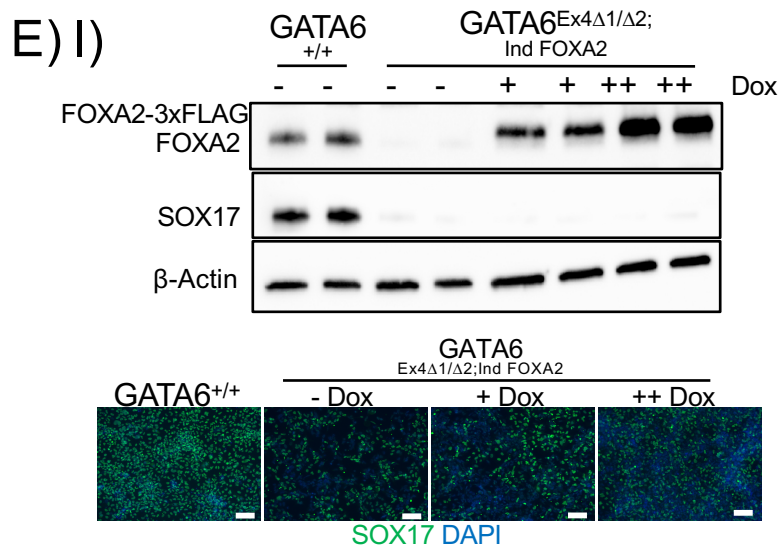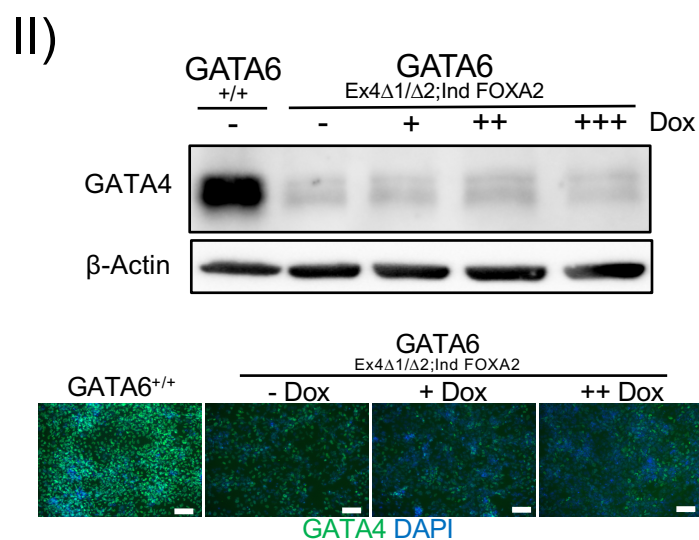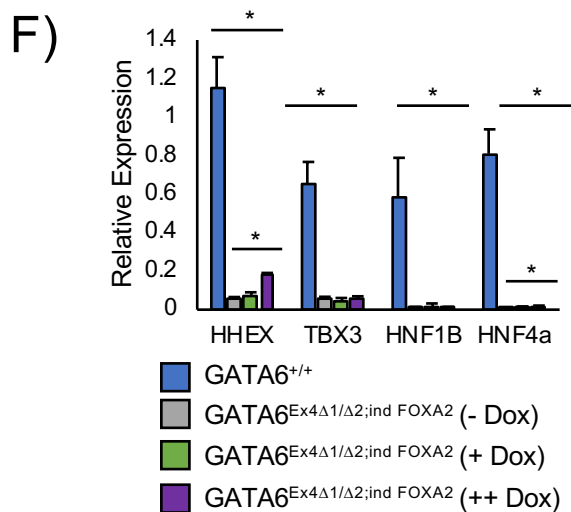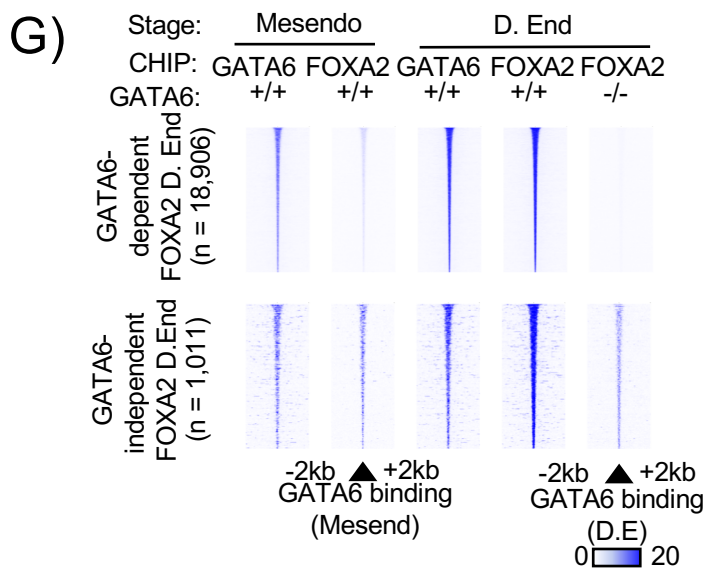

**Figure S5: Expression of doxycycline inducible FOXA2-3xflag cDNA in GATA6<sup>-/-</sup> cells.** Related to Figure 5. A) Flow cytometry analysis of GATA6<sup>Ex4Δ1/Δ2;ind FOXA2</sup> pluripotent cells positive for OCT4 expression, n=3 mean ± SD; B) Plasmid map of pGL4.20 Promega luciferase vector with and without inserted 3kb TTR promoter region; C) Graph showing analysis of luminescence from the pGL4.20-TTR-3kb or pGL4.20 luciferase vectors. Luminescence units normalized with total protein content, n=3 mean ± SD. Student's t-test: \* = p<0.05; D) Transcription factor motifs enriched at sites of increased chromatin accessibility in GATA6<sup>Ex4Δ1/Δ2;ind FOXA2</sup> (++)dox) cells when compared to GATA6<sup>Ex4Δ1/Δ2;ind FOXA2</sup>(-dox) cells. P values: hypergeometric enrichment test using HOMER motif analysis with default background, n=1,927 regions; E) Western blot and immunofluorescence analysis of GATA6<sup>+/+</sup> and GATA6<sup>Ex4Δ1/Δ2;ind FOXA2</sup> cells with increasing doxycycline supplementation at day 4 of differentiation for I) FOXA2, SOX17, β-actin and II) GATA4 and β-actin protein expression. Immunofluorescence scale bar: 100μM; F) Graph showing RT-qPCR analysis of foregut-enriched mRNAs at day 4 of differentiation in GATA6<sup>+/+</sup> and GATA6<sup>Ex4Δ1/Δ2;ind FOXA2</sup> cells with increasing doxycycline supplementation. Levels of mRNA were normalized to the housekeeping mRNA *RPL13a*. n=3, mean ± SD. Student's t-test: \* = p<0.05; G) Heatmap depicting FOXA2 binding at regions of co-binding with GATA6 in GATA6<sup>+/+</sup> definitive endoderm that are GATA6-dependent and GATA6-independent. GATA6 and FOXA2 CHIP-seq intensity displayed from GATA6<sup>+/+</sup> and GATA6<sup>Ex4Δ1/Δ2;ind FOXA2</sup> (++)dox) cells during definitive endoderm formation.

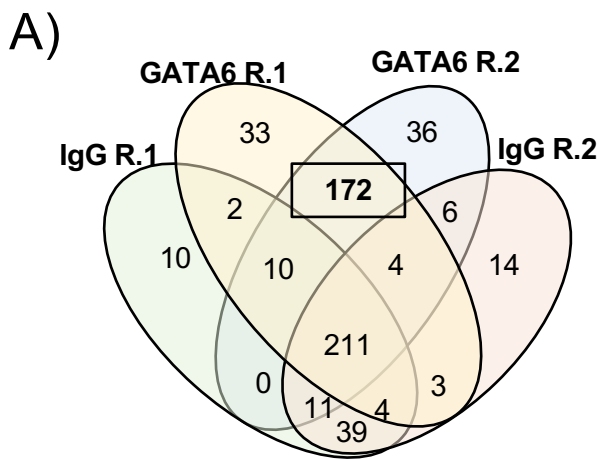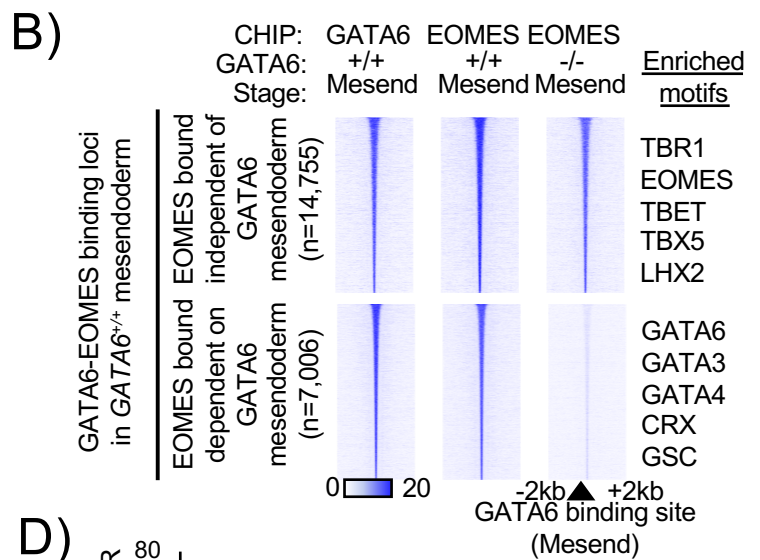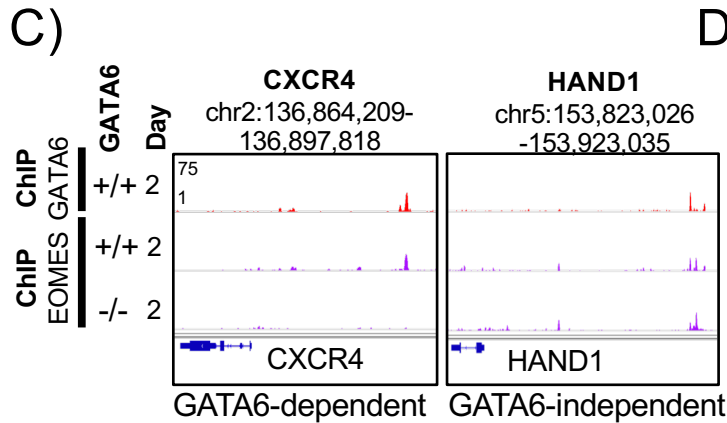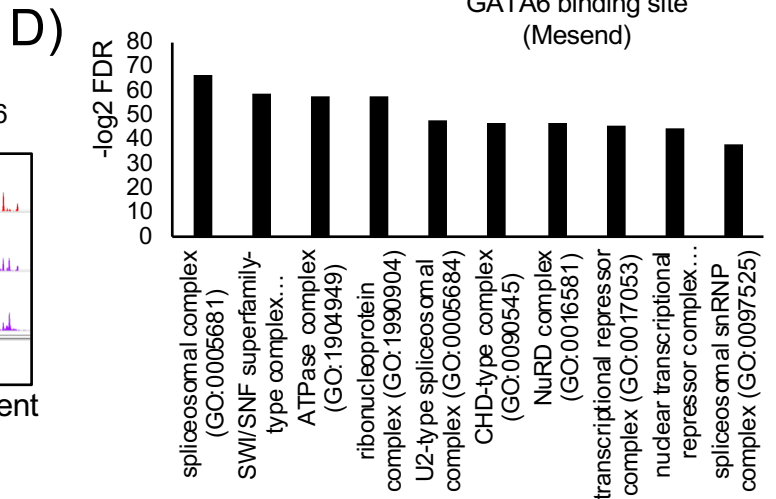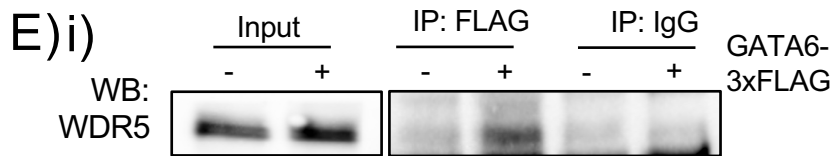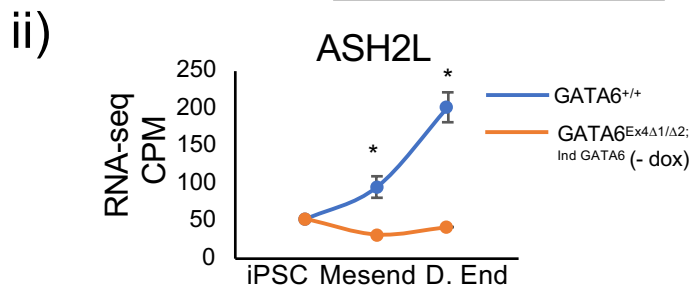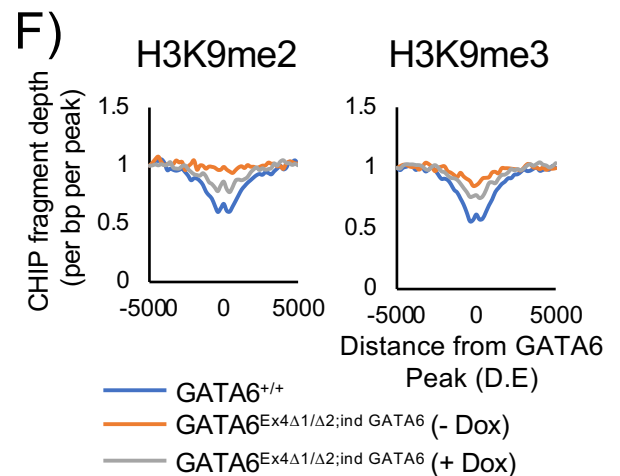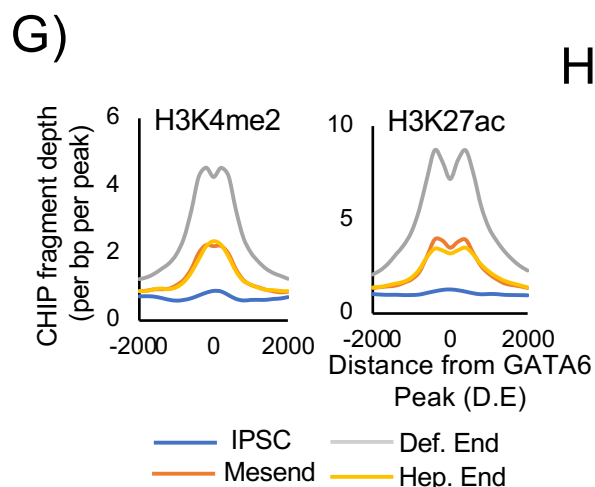

**H)**

**GATA6 bound, transiently accessible loci in definitive endoderm vs loci that retain accessibility**

| All loci (n=691) |       |         | GATA6-dependent loci (n=228) |       |         |
|------------------|-------|---------|------------------------------|-------|---------|
| Name             | motif | P-value | Name                         | motif | P-value |
| BORIS            |       | 1e-7    | NKX2.1                       |       | 1e-3    |
| TBET             |       | 1e-5    | PRDM14                       |       | 1e-2    |
| E2A              |       | 1e-5    | CDX2                         |       | 1e-2    |
| ZEB1             |       | 1e-4    | PAX8                         |       | 1e-2    |

**Figure S6: Extended investigation of GATA6-interacting proteins.** Related to Figure 6. A) Venn diagram depicting the proteins which were identified GATA6 and IgG immunoprecipitations, n=2 replicates; B) Heatmap depicting GATA6 and EOMES CHIP-seq density at regions of GATA6-dependent and GATA6-independent EOMES binding in *GATA6*<sup>+/+</sup> and *GATA6*<sup>Ex4Δ1/Δ2;ind GATA6</sup> (-dox) mesendoderm cell populations (day 2). Top 5 motifs uniquely overrepresented in each subset of GATA6-EOMES peaks. P values: hypergeometric enrichment test using HOMER motif analysis. The alternate peak subset used as the background dataset to remove motifs equally enriched within both datasets; C) Genome viewer representation of GATA6 and EOMES CHIP-seq data in mesendoderm cell populations at the *CXCR4* and *HAND1* gene loci in *GATA6*<sup>+/+</sup> and *GATA6*<sup>Ex4Δ1/Δ2;ind GATA6</sup> cells without doxycycline; *GATA6*<sup>-/-</sup> refers to *GATA6*<sup>Ex4Δ1/Δ2;ind GATA6</sup> cells; D) GO analysis for the complexes enriched in the GATA6 interactome; E) Investigation of GATA6-H3K4 methyltransferase interactions I) co-immunoprecipitation validation for WDR5 protein II) RNA-seq gene expression data of *ASH2L*, a H3K4 methyltransferase-associated factor, normalized by counts per million, n=2 mean ± SD. \*:p<0.05 using GSA analysis; F) CHIP-seq fragment depth of H3K9me2 (KDM1A target) and H3K9me3 (KDM1A refractive) fragment depth profiles at regions of slow onset (day 4) GATA6 dependent chromatin remodeling (n=2404 sites) reveal similar profiles. Graphs centered on GATA6 binding site in definitive endoderm; G) Temporal profile of equivalent stage H3K27ac and H3K4me2 published CHIP-seq (Loh et al., 2014) fragment depth during the early stages of liver development at sites of GATA6-dependent chromatin remodeling (n=2,404 sites); H) Motifs enriched at GATA6-bound loci that become accessible during endoderm formation, then reduce in accessibility during hepatic specification. P values: hypergeometric enrichment test using HOMER motif analysis. Regions that maintain accessibility during hepatic specification used as the background dataset to remove equally enriched motifs from the analysis.

| Day 0-2      |                               |              |                               |
|--------------|-------------------------------|--------------|-------------------------------|
| Increased    |                               | Decreased    |                               |
| No. of Peaks | Transcription factor          | No. of Peaks | Transcription factor          |
| 243          | EOMES FOXA2 GATA6 SOX17       | 210          | NANOG                         |
| 126          | GATA6                         | 103          | NANOG OCT4 SALL4 SOX2         |
| 99           | EOMES GATA6 SOX17             | 83           | NANOG OCT4                    |
| 99           | GATA6 SOX17                   | 63           | NANOG OCT4 SOX2               |
| 94           | EOMES                         | 47           | OCT4                          |
| 69           | EOMES FOXA2 GATA6             | 40           | NANOG SALL4                   |
| 56           | FOXA2                         | 34           | FOXA2                         |
| 52           | FOXA2 GATA6 SOX17             | 32           | FOXA2 NANOG                   |
| 49           | EOMES GATA6                   | 27           | NANOG OCT4 SALL4              |
| 47           | EOMES FOXA2 GATA6 NANOG SOX17 | 25           | HNF4A                         |
| Day 2-4      |                               |              |                               |
| Increased    |                               | Decreased    |                               |
| No. of Peaks | Transcription factor          | No. of Peaks | Transcription factor          |
| 293          | EOMES FOXA2 GATA6 SOX17       | 34           | NANOG                         |
| 263          | FOXA2                         | 16           | NANOG OCT4 SALL4 SOX2         |
| 140          | FOXA2 GATA6 SOX17             | 15           | OCT4 SALL4                    |
| 103          | EOMES FOXA2                   | 13           | FOXA2                         |
| 83           | FOXA2 GATA6                   | 12           | NANOG OCT4                    |
| 76           | EOMES FOXA2 GATA6             | 11           | NANOG OCT4 SALL4 SOX2 T       |
| 75           | FOXA2 SOX17                   | 8            | FOXA2 NANOG                   |
| 74           | EOMES FOXA2 SOX17             | 6            | NANOG OCT4 SOX2               |
| 73           | SOX17                         | 6            | SMAD2/3                       |
| 72           | GATA6 SOX17                   | 5            | EOMES                         |
| Day 4-6      |                               |              |                               |
| Increased    |                               | Decreased    |                               |
| No. of Peaks | Transcription factor          | No. of Peaks | Transcription factor          |
| 205          | FOXA2                         | 64           | EOMES FOXA2 GATA6 SOX17       |
| 36           | EOMES FOXA2                   | 43           | GATA6                         |
| 28           | HNF4A                         | 41           | GATA6 SOX17                   |
| 23           | FOXA2 HNF4A                   | 37           | EOMES GATA6 SOX17             |
| 20           | FOXA2 SOX17                   | 25           | NANOG                         |
| 17           | FOXA2 NANOG                   | 23           | FOXA2 GATA6 SOX17             |
| 16           | HNF1B                         | 20           | EOMES FOXA2 GATA6             |
| 16           | NANOG                         | 19           | FOXA2                         |
| 14           | EOMES FOXA2 GATA6 SOX17       | 17           | EOMES GATA6                   |
| 14           | EOMES FOXA2 SOX17             | 16           | SOX17                         |
| Day 6-8      |                               |              |                               |
| Increased    |                               | Decreased    |                               |
| No. of Peaks | Transcription factor          | No. of Peaks | Transcription factor          |
| 77           | HNF4A                         | 40           | FOXA2                         |
| 54           | FOXA2                         | 33           | EOMES FOXA2 GATA6 SOX17       |
| 26           | NANOG                         | 15           | EOMES FOXA2                   |
| 11           | FOXA2 HNF4A                   | 14           | EOMES FOXA2 GATA6             |
| 8            | HNF1B                         | 13           | EOMES FOXA2 SOX17             |
| 7            | NANOG OCT4                    | 9            | EOMES FOXA2 GATA6 NANOG SOX17 |
| 6            | EOMES FOXA2                   | 8            | SOX17                         |
| 6            | FOXA2 NANOG                   | 7            | NANOG                         |
| 6            | GATA6                         | 6            | EOMES                         |
| 5            | FOXA2 GATA6                   | 6            | EOMES GATA6 SOX17             |

**Table S2: Overlapping chromatin accessibility with transcription factor co-binding.** Overlap of transcription factor binding sites identified by CHIP-seq with differential chromatin accessibility at 48-hour intervals during endoderm formation and specification (Fisher et al., 2017; Tsankov et al., 2015). Related to Figure 1.

| GATA6-dependent chromatin opening (mesendoderm; n= 1,325) vs ATAC-negative (n=43,246)           |          | GATA6-dependent chromatin opening (definitive endoderm; n=2,404) vs ATAC-negative (n=43,246) |           |
|-------------------------------------------------------------------------------------------------|----------|----------------------------------------------------------------------------------------------|-----------|
| Motif name                                                                                      | P-value  | Motif name                                                                                   | P-value   |
| <i>GATA1</i>                                                                                    | 1.00E-05 | <i>FOXA2</i>                                                                                 | 1.00E-12  |
| <i>SOX17</i>                                                                                    | 1.00E-05 | <i>FOXA1</i>                                                                                 | 1.00E-12  |
| <i>SOX6</i>                                                                                     | 1.00E-04 | <i>SOX17</i>                                                                                 | 1.00E-12  |
| <i>TBOX:SMAD</i>                                                                                | 1.00E-04 | <i>FOXA3</i>                                                                                 | 1.00E-11  |
| <i>GATA2</i>                                                                                    | 1.00E-04 | <i>SOX2</i>                                                                                  | 1.00E-09  |
| <i>TBX5</i>                                                                                     | 1.00E-03 | <i>FOX:EBOX</i>                                                                              | 1.00E-09  |
| <i>SOX15</i>                                                                                    | 1.00E-03 | <i>FOXM1</i>                                                                                 | 1.00E-09  |
| <i>OCT6</i>                                                                                     | 1.00E-03 | <i>SOX15</i>                                                                                 | 1.00E-08  |
| <i>BRN1</i>                                                                                     | 1.00E-03 | <i>SOX6</i>                                                                                  | 1.00E-08  |
| <i>EBF</i>                                                                                      | 1.00E-03 | <i>SOX3</i>                                                                                  | 1.00E-08  |
| <b>GATA6-bound chromatin opening (hepatic specification; n=259) vs ATAC-negative (n=43,246)</b> |          | <b>ATAC-negative (n=43,246) vs All GATA6-dependent chromatin opening (n=3,988)</b>           |           |
| Motif name                                                                                      | P-value  | Motif name                                                                                   | P-value   |
| <i>FOX:EBOX</i>                                                                                 | 1.00E-08 | <i>GATA3, DR4</i>                                                                            | 1.00E-548 |
| <i>FOXA1</i>                                                                                    | 1.00E-06 | <i>PDX1</i>                                                                                  | 1.00E-141 |
| <i>FOXM1</i>                                                                                    | 1.00E-05 | <i>GATA4</i>                                                                                 | 1.00E-38  |
| <i>FOXA3</i>                                                                                    | 1.00E-04 | <i>RUNX2</i>                                                                                 | 1.00E-30  |
| <i>FO XK2</i>                                                                                   | 1.00E-04 | <i>MITF</i>                                                                                  | 1.00E-30  |
| <i>FOXA2</i>                                                                                    | 1.00E-04 | <i>HOXA2</i>                                                                                 | 1.00E-28  |
| <i>HNF1B</i>                                                                                    | 1.00E-03 | <i>ZNF675</i>                                                                                | 1.00E-25  |
| <i>FOXF1</i>                                                                                    | 1.00E-03 | <i>HOXB4</i>                                                                                 | 1.00E-25  |
| <i>HNF4A</i>                                                                                    | 1.00E-02 | <i>IRF8</i>                                                                                  | 1.00E-24  |
| <i>SOX9</i>                                                                                     | 1.00E-02 | <i>LXRE</i>                                                                                  | 1.00E-23  |

**Table S4: Motif enrichment in different ATAC-subgroups during endoderm formation at sites of GATA6 binding.** Motifs co-enriched at regions GATA6-dependent chromatin accessibility using GATA6-bound ATAC-negative sites as background to remove motifs equally present in both groups. Analysis reversed for ATAC-negative subset. P values: hypergeometric enrichment test. Related to Figure 4.

| iPSC- Definitive endoderm |         | Definitive endoderm – Hepatic endoderm |         |                               |         |                           |         |                               |         |
|---------------------------|---------|----------------------------------------|---------|-------------------------------|---------|---------------------------|---------|-------------------------------|---------|
| Decrease vs Increase      |         | Day 6<br>Increase vs Decrease          |         | Day 6<br>Decrease vs Increase |         | Day 8<br>Increase vs Down |         | Day 8<br>Decrease vs Increase |         |
| Motif Name                | P-value | Motif Name                             | P-value | Motif Name                    | P-value | Motif Name                | P-value | Motif Name                    | P-value |
| OCT4-SOX2-TCF-NANOG       | 1e-5    | FOX:EBOX                               | 1e-18   | Unknown ESC element           | 1e-22   | HNF1B                     | 1e-7    | TBET                          | 1e-10   |
| BORIS                     | 1e-2    | FOXM1                                  | 1e-17   | ZIC3                          | 1e-12   | PR                        | 1e-5    | PAX6                          | 1e-5    |
| Etv2                      | 1e-2    | FOXA1                                  | 1e-16   | CHOP                          | 1e-9    | AP-2alpha                 | 1e-4    | EOMES                         | 1e-5    |
| NF1-halfsite              | 1e-2    | FOXA2                                  | 1e-12   | PITX1:EBOX                    | 1e-9    | SOX10                     | 1e-3    | GATA:SCL                      | 1e-4    |
| SPDEF                     | 1e-2    | FOXL2                                  | 1e-11   | KLF5                          | 1e-9    | HOXB13                    | 1e-3    | MAZ                           | 1e-3    |

**Table S6: Motif enrichment at GATA6-bound regions that decrease in accessibility.** Motifs enriched at regions of GATA6-bound decreases in accessibility during and post definitive endoderm formation. Sites that increase in accessibility used as background to remove motifs equally present in both groups. Analysis reversed for assessment of GATA6-bound sites that increase in accessibility during the same time period. P values: hypergeometric enrichment test. Related to Figure 6.



| CRISPR Ca9 gRNAs and Primers |                        |                           |                           |
|------------------------------|------------------------|---------------------------|---------------------------|
| GATA6 Exon                   | Sequence Type          | Fwd 5'-3'                 | Rev 5'-3'                 |
| Exon 2                       | CRISPR/Cas9 gRNA       | CACCGAGTGGGCCAGCCAACCACGC | AAACGCGTGGTTGGCTGGCCCACTC |
|                              | INDEL PCR primers      | TCCATGCTGCCCGGCCTAC       | TGCCGTATGGAGGGCTGT        |
|                              | Sequencing primers     | AGATGTACCAGACCCTCGCC      | CCCACGTAGGGCGAGTAGG       |
| Exon 4                       | CRISPR/Cas9 gRNA       | CACCGTTATGGCGCAGAAACGCCG  | AAACCGCGTTTTCTGCGCCATAAC  |
|                              | INDEL PCR primers      | ACCACCTTATGGCGCAGAAA      | GCAGAATACATGGCATAACCC     |
|                              | Sequencing primers     | ACATACTTGTGATGACAGGGACA   | CGTTTGCAATAGTTCAACTGG     |
| qPCR Primers and Probes      |                        |                           |                           |
| Gene                         | Fwd (5'-3')            | Probe (5'-3')             | Rev (5'-3')               |
| GATA6                        | TTCGTTTCCTGGTTGAATTCC  | TCATAGCAAGTGGTCTGGGCACC   | TGCAATGCTTGTGGACTCTAC     |
| GATA4                        | AGGCGTTGCACAGATAGTG    | CATAGCCCCACAGTTGACACACTCT | CGACACCCCAATCTCGAT        |
| FOXA2                        | GAGCGGTGAAGATGGAAGG    | CAGCTACTATGCAGAGCCCGAGG   | TGTACGTGTTTCATGCCGTT      |
| SOX17                        | CAACTATCCTGACGTGTGACAG | TGCAGGCCAGAAGCAGTGTTACA   | ACCCAGGAGTCTGAGGATTT      |
| HHEX                         | CATTTAGCGCGTCGATTCTG   | CAGCTCAGCGAGAGACAGGTC     | GATTCTCCAACGACCAGACC      |
| TBX3                         | GCGGCCATGTACGTGTAG     | TGTCCCCTTTGGAAGCCTGTTC    | TGCCCTTCCACCTCCAG         |
| HNF1B                        | GATACCAGCAGCATCAGTACA  | AACAGTGTCTCTACAAGCCTGGTG  | ACGAAGTAAGTGGTGTGTGG      |
| HNF4A                        | GGTGGACAAAGACAAGAGGAA  | TCTGGACGGCTTCTTCTTCATGC   | CTCATAGCTTGACCTTCGAGTG    |

**Table S7: List of oligonucleotides used.** RT-qPCR primers, CRISPR/Cas9 gRNAs, PCR and sequencing primers. CRISPR/Cas9 oligonucleotides were designed based on previous reports of successful GATA6 gene editing (Shi et al., 2017; Tiyaonchai et al., 2017). Related to STAR methods and Key Resource Table.

| Antibodies                       |                         |              |              |                    |                |      |       |
|----------------------------------|-------------------------|--------------|--------------|--------------------|----------------|------|-------|
| Target                           | Company                 | Product Code | Western blot | Immunofluorescence | Flow Cytometry | CHIP | Co-IP |
| GATA6                            | Cell Signaling          | 5851         | 1:1000       | 1:7500             | 1:200          | 1:50 | -     |
| GATA4                            | Santa Cruz              | SC-1237      | 1:200        | 1:100              | -              | -    | -     |
| FOXA2                            | RnD                     | AF2400       | 1:500        | 1:200              | 1:200          | 5µg  | -     |
| SOX17                            | RnD                     | AF1924       | 1:500        | 1:50               | 1:50           | -    | -     |
| OCT4                             | Santa Cruz              | SC-9081      | -            | 1:100              | 1:100          | -    | -     |
| HNF4A                            | Santa Cruz              | SC-6556      | -            | 1:200              | 1:100          | -    | -     |
| EOMES                            | Cell Signaling          | 66325        | -            | -                  | -              | 1:50 | -     |
| FLAG                             | Sigma-Aldrich           | F1804        | 1:1000       | 1:1000             | -              | -    | 1µg   |
| Normal Mouse IgG                 | Millipore               | 12-371       | -            | -                  | -              | -    | 1µg   |
| CHD4                             | Cell Signaling          | 12011        | 1:750        | -                  | -              | -    | -     |
| SMARCA4                          | Cell Signaling          | 49360        | 1:750        | -                  | -              | -    | -     |
| KDM1A                            | Cell Signaling          | 2184         | 1:750        | -                  | -              | -    | -     |
| WDR5                             | Cell Signaling          | 13105        | 1:750        | -                  | -              | -    | -     |
| beta-Actin                       | Sigma-Aldrich           | AC-15        | 1:5000       | -                  | -              | -    | -     |
| H3K4me1                          | Diagenode               | C15410194    | -            | -                  | -              | 2µg  | -     |
| H3K9me2                          | Abcam                   | ab1220       | -            | -                  | -              | 5µg  | -     |
| H3K9me3                          | Abcam                   | ab8898       | -            | -                  | -              | 2µg  | -     |
| Donkey anti-rabbit alexafluor488 | ThermoFisher Scientific | A21206       | -            | 1:1000             | 1:500          | -    | -     |
| Donkey anti-goat alexafluor488   | ThermoFisher Scientific | A11055       | -            | 1:1000             | 1:500          | -    | -     |
| Goat anti-mouse alexafluor568    | ThermoFisher Scientific | A11031       | -            | 1:1000             | -              | -    | -     |
| Goat anti-Rabbit IgG-HRP         | Cell Signaling          | 7074         | 1:3000       | -                  | -              | -    | -     |
| Goat anti-mouse IgG-HRP          | ThermoFisher Scientific | 31430        | 1:5000       | -                  | -              | -    | -     |
| Mouse anti-Goat IgG-HRP          | Santa Cruz              | SC-2354      | 1:3000       | -                  | -              | -    | -     |

**Table S8: List of antibodies used.** Antibodies used in the study with the assay-specific dilutions. Related to STAR methods and Key Resource Table.
